# Supplementary material
Source: PubMed Central journal article supplement (PMC5386792)
Supplement: NIHMS827279-supplement-01.pdf [file NIHMS827279-supplement-01.pdf]

**Supplementary Table 1.** Characteristics of eligible and selected patients. Statistics presented are frequency (percent).

|                      | Eligible            |                            |                                       |                                         | Selected                  |                           |                                       |                                         |
|----------------------|---------------------|----------------------------|---------------------------------------|-----------------------------------------|---------------------------|---------------------------|---------------------------------------|-----------------------------------------|
|                      | Overall<br>(N=1864) | No Cancer<br>(N=1228; 66%) | Low-Grade<br>Cancer**<br>(N=446; 24%) | High-Grade<br>Cancer***<br>(N=190; 10%) | Overall*<br>(N=1000; 54%) | No Cancer<br>(N=659; 66%) | Low-Grade<br>Cancer**<br>(N=239; 24%) | High-Grade<br>Cancer***<br>(N=102; 10%) |
| Race                 |                     |                            |                                       |                                         |                           |                           |                                       |                                         |
| White, Non-Hispanic  | 1643 (88%)          | 1105 (90%)                 | 387 (87%)                             | 151 (79%)                               | 835 (51%)                 | 575 (87%)                 | 186 (78%)                             | 74 (73%)                                |
| Black, Non-Hispanic  | 113 (7.1%)          | 50 (4%)                    | 39 (8.7%)                             | 24 (13%)                                | 113 (100%)                | 50 (7.6%)                 | 39 (16%)                              | 24 (24%)                                |
| Hispanic             | 42 (2.3%)           | 23 (1.9%)                  | 13 (2.9%)                             | 6 (3.2%)                                | 23 (55%)                  | 12 (1.8%)                 | 9 (3.8%)                              | 2 (2.0%)                                |
| Asian                | 45 (2.4%)           | 37 (3.0%)                  | 4 (0.9%)                              | 4 (2.1%)                                | 20 (44%)                  | 16 (2.4%)                 | 3 (1.3%)                              | 1 (1.0%)                                |
| Pacific Islander     | 15 (0.8%)           | 10 (0.8%)                  | 2 (0.5%)                              | 3 (1.6%)                                | 5 (33%)                   | 4 (0.6%)                  | 1 (0.4%)                              | 0 (0%)                                  |
| American Indian      | 4 (0.2%)            | 2 (0.2%)                   | 1 (0.2%)                              | 1 (0.5%)                                | 2 (50%)                   | 1 (0.2%)                  | 1 (0.4%)                              | 0 (0%)                                  |
| Unknown              | 2 (0.1%)            | 1 (<0.1%)                  | 0 (0%)                                | 1 (0.5%)                                | 2 (100%)                  | 1 (0.2%)                  | 0 (0%)                                | 1 (1.0%)                                |
| Age At Randomization |                     |                            |                                       |                                         |                           |                           |                                       |                                         |
| ≤ 59                 | 524 (28%)           | 355 (29%)                  | 125 (28%)                             | 44 (23%)                                | 274 (52%)                 | 191 (29%)                 | 63 (26%)                              | 20 (20%)                                |
| 60-64                | 578 (31%)           | 402 (33%)                  | 120 (27%)                             | 56 (29%)                                | 302 (52%)                 | 217 (33%)                 | 58 (24%)                              | 27 (26%)                                |
| 65-69                | 498 (27%)           | 314 (26%)                  | 128 (29%)                             | 56 (29%)                                | 275 (55%)                 | 165 (25%)                 | 74 (31%)                              | 36 (35%)                                |
| ≥ 70                 | 264 (14%)           | 157 (13%)                  | 73 (16%)                              | 34 (18%)                                | 149 (56%)                 | 86 (13%)                  | 44 (18%)                              | 19 (19%)                                |

\*Percentage represents the proportion of patients from the PLCO cohort that were selected.

\*\* Low-grade cancer includes Gleason score 6 (Gleason Grade Group 1)

\*\*\* High-grade cancer includes Gleason score  $\geq 7$  (Gleason Grade Group  $\geq 2$ )
